# Supplementary material
Source: PubMed Central journal article supplement (PMC7643422)
Supplement: TBSD_A_1841028_SM0893.pdf [file TBSD_A_1841028_SM0893.pdf]

## Supporting Information

### **An *in-silico* analysis of ivermectin interaction with potential SARS-CoV-2 targets and host nuclear importin $\alpha$**

Faizul Azam<sup>1,\*</sup>, Ismail M. Taban<sup>2,3</sup>, Eltayeb E M Eid<sup>1</sup>, Muzaffar Iqbal<sup>4</sup>, Ozair Alam<sup>5</sup>,  
Shamshir Khan<sup>6</sup>, Danish Mahmood<sup>7</sup>, Md Jamir Anwar<sup>7</sup>, Habibullah Khalilullah<sup>1</sup>, M. U.  
Khan<sup>1</sup>

<sup>1</sup> *Department of Pharmaceutical Chemistry & Pharmacognosy, Unaizah College of Pharmacy, Qassim University, Saudi Arabia*

<sup>2</sup> *School of Biosciences, Cardiff University, King Edward VII Avenue, Cardiff CF103NB, U.K.*

<sup>3</sup> *Department of Pharmaceutical Chemistry, Faculty of Pharmacy, Misurata University, Misurata, Libya*

<sup>4</sup> *Department of Pharmaceutical Chemistry, College of Pharmacy, King Saud University, PO Box No. 2457, Riyadh, Saudi Arabia*

<sup>5</sup> *Medicinal Chemistry and Molecular Modelling Lab, Department of Pharmaceutical Chemistry, School of Pharmaceutical Education and Research, Jamia Hamdard, New Delhi-110062, India*

<sup>6</sup> *Buraidah College of Dentistry and Pharmacy, Buraidah, Al-Qassim, Saudi Arabia*

<sup>7</sup> *Department of Pharmacology & Toxicology, Unaizah College of Pharmacy, Qassim University, Saudi Arabia*

\*Corresponding author Tel +966-50-2728652; E-mail: [faizulazam@gmail.com](mailto:faizulazam@gmail.com);

[f.azam@qu.edu.sa](mailto:f.azam@qu.edu.sa)

**Table S1. Non-bond interactions of ivermectin with 15 potential COVID-19 targets and importin  $\alpha$ .**

| S.No. | Target               | Hydrogen bond interactions |          | Hydrophobic interactions |          |          |
|-------|----------------------|----------------------------|----------|--------------------------|----------|----------|
|       |                      | Residues                   | Distance | Type                     | Residues | Distance |
| 1.    | Main Protease        | Gln189                     | 1.67     | Alkyl                    | Pro168   | 4.88     |
|       |                      |                            |          | Alkyl                    | Met165   | 3.76     |
|       |                      |                            |          | Alkyl                    | Pro168   | 4.07     |
|       |                      |                            |          | Alkyl                    | Met49    | 4.11     |
|       |                      |                            |          | Alkyl                    | Met49    | 5.34     |
|       |                      |                            |          | Alkyl                    | Leu50    | 4.49     |
|       |                      |                            |          | $\pi$ -Alkyl             | His41    | 3.96     |
| 2.    | Papain-like protease | Tyr264                     | 1.88     | Alkyl                    | Pro248   | 5.47     |
|       |                      |                            |          | Alkyl                    | Pro248   | 4.87     |
|       |                      |                            |          | Alkyl                    | Met208   | 4.90     |
|       |                      |                            |          | Alkyl                    | Pro247   | 4.52     |
|       |                      |                            |          | Alkyl                    | Pro247   | 5.10     |
|       |                      |                            |          | Alkyl                    | Pro248   | 4.47     |
|       |                      |                            |          | $\pi$ -Alkyl             | Tyr268   | 5.21     |
| 3.    | RdRp (RTP site)      | Ser549                     | 1.87     | Alkyl                    | Pro620   | 4.90     |
|       |                      |                            |          | Alkyl                    | Lys798   | 4.69     |
|       |                      |                            |          | $\pi$ -Alkyl             | U20      | 5.31     |
| 4.    | RdRp (RNA site)      | Lys545                     | 2.71     | Alkyl                    | Ala688   | 4.10     |
|       |                      | Gln573                     | 1.87     | Alkyl                    | Ala688   | 3.70     |

---

|    |                  |        |      |              |        |      |
|----|------------------|--------|------|--------------|--------|------|
|    |                  | Ala685 | 1.85 | Alkyl        | Ala688 | 4.56 |
|    |                  |        |      | Alkyl        | Ala688 | 4.73 |
|    |                  |        |      | Alkyl        | Val557 | 4.03 |
|    |                  |        |      | Alkyl        | Leu576 | 4.79 |
|    |                  |        |      | Alkyl        | Lys577 | 4.30 |
| 5. | Helicase (Nsp13; | Gln537 | 1.98 | Alkyl        | Ala312 | 4.40 |
|    | ADP site)        | Ser539 | 2.81 | Alkyl        | Ala313 | 4.38 |
|    |                  | Glu540 | 1.77 | Alkyl        | Ala316 | 4.30 |
|    |                  | Glu540 | 2.01 | Alkyl        | Lys320 | 5.29 |
|    |                  |        |      | Alkyl        | Lys320 | 4.12 |
| 6. | Helicase (Nsp13; | Arg212 | 2.81 | Alkyl        | Arg178 | 4.97 |
|    | NCB site)        | Arg339 | 2.58 | Alkyl        | Arg178 | 4.64 |
|    |                  | Arg339 | 2.61 | Alkyl        | Ala312 | 4.96 |
|    |                  |        |      | Alkyl        | Arg178 | 4.79 |
|    |                  |        |      | Alkyl        | Cys309 | 4.50 |
|    |                  |        |      | Alkyl        | Met378 | 4.07 |
|    |                  |        |      | $\pi$ -Alkyl | His311 | 5.31 |
| 7. | Nsp14 (ExoN)     | Gln145 | 2.52 | Alkyl        | Ala187 | 4.99 |
|    |                  |        |      | Alkyl        | Ala187 | 4.24 |
|    |                  |        |      | Alkyl        | Ala187 | 4.26 |
|    |                  |        |      | Alkyl        | Pro141 | 4.79 |
|    |                  |        |      | Alkyl        | Pro142 | 5.25 |
|    |                  |        |      | Alkyl        | Pro141 | 4.17 |
|    |                  |        |      | $\pi$ -Alkyl | His95  | 4.96 |
|    |                  |        |      | $\pi$ -Alkyl | Phe146 | 4.89 |
|    |                  |        |      | $\pi$ -Alkyl | Phe146 | 4.35 |

---

|     |                  |        |      |              |        |      |
|-----|------------------|--------|------|--------------|--------|------|
|     |                  |        |      | $\pi$ -Alkyl | Phe146 | 5.31 |
|     |                  |        |      | $\pi$ -Alkyl | Trp186 | 4.74 |
|     |                  |        |      | $\pi$ -Alkyl | Phe190 | 5.22 |
| 8.  | Nsp14 (N7-MTase) | -      | -    | Alkyl        | Ala307 | 4.66 |
|     |                  |        |      | Alkyl        | Ala307 | 3.85 |
|     |                  |        |      | Alkyl        | Arg310 | 4.71 |
|     |                  |        |      | Alkyl        | Arg310 | 4.43 |
|     |                  |        |      | Alkyl        | Cys340 | 4.80 |
|     |                  |        |      | Alkyl        | Arg310 | 4.40 |
|     |                  |        |      | Alkyl        | Pro342 | 3.95 |
|     |                  |        |      | Alkyl        | Pro335 | 4.10 |
|     |                  |        |      | Alkyl        | Pro335 | 4.25 |
|     |                  |        |      | Alkyl        | Lys336 | 4.74 |
|     |                  |        |      | $\pi$ -Alkyl | Trp292 | 5.10 |
|     |                  |        |      | $\pi$ -Alkyl | His314 | 4.81 |
|     |                  |        |      | $\pi$ -Alkyl | His314 | 4.64 |
| 9.  | Spike RBD        | Gln493 | 2.04 | Alkyl        | Leu455 | 4.87 |
|     |                  | Ser494 | 2.10 | Alkyl        | Leu455 | 5.31 |
|     |                  | Glu484 | 2.10 | $\pi$ -Alkyl | Tyr449 | 4.88 |
|     |                  |        |      | $\pi$ -Alkyl | Tyr449 | 5.09 |
|     |                  |        |      | $\pi$ -Alkyl | Phe456 | 5.02 |
|     |                  |        |      | $\pi$ -Alkyl | Tyr505 | 5.40 |
| 10. | Spike monomer    | -      | -    | Alkyl        | Arg403 | 4.63 |
|     |                  |        |      | Alkyl        | Val350 | 4.64 |
|     |                  |        |      | Alkyl        | Pro507 | 4.17 |
| 11. | Spike trimer     | Asn334 | 2.49 | Alkyl        | Pro337 | 4.21 |

|     |                        |         |      |              |        |      |
|-----|------------------------|---------|------|--------------|--------|------|
|     |                        | Arg357  | 3.08 | Alkyl        | Val171 | 3.95 |
|     |                        | Arg357  | 3.05 | $\pi$ -Alkyl | Phe168 | 5.05 |
| 12. | S2 (post fusion state) | Leu1166 | 2.72 | Alkyl        | Ala972 | 5.42 |
|     |                        | Ala972  | 3.02 |              |        |      |
| 13. | N protein (C domain)   | Arg73   | 2.30 | Alkyl        | Ala90  | 3.72 |
|     |                        | Gln35   | 2.47 | Alkyl        | Ala90  | 5.19 |
|     |                        | Gln35   | 2.34 | Alkyl        | Ala90  | 4.27 |
|     |                        | Gln35   | 2.58 | $\pi$ -Alkyl | Trp84  | 4.70 |
|     |                        | Thr36   | 2.50 | $\pi$ -Alkyl | Trp84  | 3.94 |
|     |                        |         |      | $\pi$ -Alkyl | Trp84  | 5.28 |
|     |                        |         |      | $\pi$ -Alkyl | Trp84  | 5.07 |
| 14. | N protein (N domain)   | -       | -    | Alkyl        | Ala50  | 3.77 |
|     |                        |         |      | Alkyl        | Arg52  | 4.28 |
|     |                        |         |      | $\pi$ -Alkyl | Tyr69  | 5.31 |
| 15. | Nsp9                   | Val7    | 2.40 | Alkyl        | Pro6   | 4.53 |
|     |                        | Val7    | 1.91 | Alkyl        | Ala8   | 4.46 |
|     |                        | Gln11   | 2.19 | Alkyl        | Ala8   | 4.70 |
|     |                        | Gln11   | 2.70 | Alkyl        | Ala8   | 3.85 |
|     |                        |         |      | Alkyl        | Pro6   | 4.49 |
|     |                        |         |      | Alkyl        | Met101 | 4.28 |
| 16  | Importin $\alpha$      | Trp231  | 2.73 | Alkyl        | Arg227 | 5.24 |
|     |                        | Arg238  | 2.95 | $\pi$ -Alkyl | Trp184 | 4.21 |
|     |                        | Asn228  | 2.46 | $\pi$ -Alkyl | Trp184 | 5.11 |
|     |                        | Ser149  | 1.75 | $\pi$ -Alkyl | Trp184 | 5.44 |
|     |                        |         |      | $\pi$ -Alkyl | Trp184 | 5.18 |
|     |                        |         |      | $\pi$ -Alkyl | Trp231 | 4.81 |

---

|              |        |      |
|--------------|--------|------|
| $\pi$ -Alkyl | Trp231 | 4.50 |
| $\pi$ -Alkyl | Trp231 | 4.90 |
| $\pi$ -Alkyl | Trp231 | 5.37 |
| $\pi$ -Alkyl | Trp231 | 4.87 |

---

**Table S2. Results of docking and MM/GBSA computations of ivermectin in complex with 15 potential COVID-19 targets and importin  $\alpha$ .**

| S.N | Targets              | Docking models (Top 10) | $\Delta G_{\text{Bind}}$ (Auto Dock Vina) | MM/GBSA                  |                          |                           |                          |        |                         |        |
|-----|----------------------|-------------------------|-------------------------------------------|--------------------------|--------------------------|---------------------------|--------------------------|--------|-------------------------|--------|
|     |                      |                         |                                           | $\Delta G_{\text{Bind}}$ | $\Delta G_{\text{Coul}}$ | $\Delta G_{\text{HBond}}$ | $\Delta G_{\text{Lipo}}$ | SolvGB | $\Delta G_{\text{vdw}}$ | Lig SE |
| 1   | Main                 | 1M1                     | -7.2                                      | -68.81                   | -14.75                   | -0.70                     | -38.62                   | 28.05  | -48.83                  | 22.05  |
|     | Protease             | 1M2                     | -6.8                                      | -79.35                   | -10.16                   | -0.44                     | -53.80                   | 28.52  | -59.49                  | 34.37  |
|     |                      | 1M3                     | -6.5                                      | -64.22                   | -7.89                    | -0.54                     | -46.78                   | 29.52  | -55.04                  | 42.12  |
|     |                      | 1M4                     | -6.3                                      | -53.20                   | -16.79                   | -0.85                     | -38.61                   | 34.87  | -50.42                  | 28.50  |
|     |                      | 1M5                     | -6.3                                      | -57.39                   | -11.19                   | -1.09                     | -22.75                   | 23.57  | -42.10                  | 25.07  |
|     |                      | 1M6                     | -6.3                                      | -63.57                   | -14.31                   | -0.37                     | -37.64                   | 27.09  | -46.96                  | 16.29  |
|     |                      | 1M7                     | -6.2                                      | -67.38                   | -7.85                    | -0.72                     | -41.92                   | 25.09  | -54.29                  | 13.88  |
|     |                      | 1M8                     | -6.1                                      | -52.35                   | -3.32                    | -0.41                     | -36.94                   | 29.35  | -47.20                  | 12.88  |
|     |                      | 1M9                     | -6.1                                      | -52.57                   | -0.02                    | -0.57                     | -40.05                   | 23.80  | -41.10                  | 12.58  |
|     |                      | 1M10                    | -6.1                                      | -43.31                   | -6.39                    | -0.36                     | -27.48                   | 27.41  | -43.44                  | 34.20  |
| 2   | Papain-like protease | 2M1                     | -7.1                                      | -18.31                   | 18.30                    | -1.15                     | -40.19                   | 14.80  | -36.38                  | 41.06  |
|     |                      | 2M2                     | -6.8                                      | -52.49                   | -1.60                    | -0.71                     | -47.57                   | 14.55  | -31.27                  | 33.92  |
|     |                      | 2M3                     | -6.7                                      | -60.61                   | -7.97                    | -0.44                     | -52.07                   | 25.94  | -42.95                  | 28.76  |
|     |                      | 2M4                     | -6.7                                      | -25.93                   | 4.56                     | -0.08                     | -33.07                   | 39.74  | -42.11                  | 7.11   |
|     |                      | 2M5                     | -6.6                                      | -43.53                   | 5.53                     | -1.08                     | -39.01                   | 39.42  | -42.59                  | 15.51  |
|     |                      | 2M6                     | -6.6                                      | -52.88                   | -1.49                    | 0.00                      | -43.78                   | 30.41  | -38.90                  | 1.18   |
|     |                      | 2M7                     | -6.5                                      | -43.35                   | -3.25                    | -1.54                     | -43.52                   | 29.35  | -38.86                  | 20.73  |
|     |                      | 2M8                     | -6.5                                      | -50.95                   | 7.44                     | -0.71                     | -49.28                   | 17.29  | -40.45                  | 22.85  |
|     |                      | 2M9                     | -6.4                                      | -36.14                   | 5.60                     | -0.83                     | -34.69                   | 33.57  | -44.13                  | 20.11  |
|     |                      | 2M10                    | -6.2                                      | -31.73                   | -3.82                    | -0.77                     | -29.73                   | 30.71  | -36.88                  | 9.42   |
| 3   |                      | 3M1                     | -9.9                                      | 24.72                    | -14.81                   | -1.56                     | -30.08                   | 87.47  | -51.21                  | 47.42  |

|   |            |      |      |        |        |       |        |       |        |       |
|---|------------|------|------|--------|--------|-------|--------|-------|--------|-------|
|   | RdRp       | 3M2  | -9.6 | -29.10 | 3.94   | -1.23 | -27.33 | 61.01 | -68.92 | 19.48 |
|   | (RTP site) | 3M3  | -9   | 21.18  | -25.01 | -1.05 | -36.31 | 88.74 | -29.70 | 35.68 |
|   |            | 3M4  | -9   | 22.81  | 21.83  | -0.85 | -27.23 | 52.54 | -44.43 | 39.19 |
|   |            | 3M5  | -8.3 | 19.86  | 11.50  | -0.91 | -17.42 | 57.81 | -50.43 | 54.91 |
|   |            | 3M6  | -8.3 | -25.65 | 4.03   | -1.39 | -41.23 | 55.95 | -68.32 | 35.62 |
|   |            | 3M7  | -8.2 | 9.32   | -13.21 | -1.08 | -5.28  | 55.71 | -38.28 | 35.13 |
|   |            | 3M8  | -8.1 | 16.16  | -27.62 | -0.84 | -33.08 | 97.56 | -45.68 | 45.01 |
|   |            | 3M9  | -8.1 | -42.57 | -28.13 | -1.09 | -23.93 | 79.00 | -69.29 | 13.18 |
|   |            | 3M10 | -8.1 | 42.43  | -0.30  | -1.26 | -23.05 | 95.62 | -50.92 | 51.14 |
| 4 | RdRp       | 4M1  | -8.9 | -38.28 | -1.80  | -0.48 | -41.27 | 28.94 | -43.52 | 32.69 |
|   | (RNA       | 4M2  | -8.3 | -47.86 | -6.81  | -0.99 | -32.66 | 36.19 | -47.13 | 15.00 |
|   | site)      | 4M3  | -8.2 | -53.11 | 2.46   | -0.46 | -35.35 | 23.54 | -47.18 | 14.40 |
|   |            | 4M4  | -8.2 | -50.75 | -11.05 | -0.45 | -36.64 | 33.00 | -54.49 | 16.44 |
|   |            | 4M5  | -8   | -70.06 | -22.56 | -0.89 | -37.87 | 30.74 | -47.33 | 12.87 |
|   |            | 4M6  | -8   | -66.03 | -3.07  | -0.15 | -39.75 | 29.33 | -55.54 | 5.91  |
|   |            | 4M7  | -7.9 | -45.50 | -1.77  | -0.46 | -41.99 | 32.17 | -46.89 | 20.33 |
|   |            | 4M8  | -7.7 | -62.35 | -5.06  | -0.19 | -40.79 | 20.05 | -40.85 | 6.88  |
|   |            | 4M9  | -7.7 | -66.23 | 4.63   | -0.53 | -45.18 | 23.45 | -52.66 | 9.60  |
|   |            | 4M10 | -7.7 | -59.82 | -1.43  | -0.26 | -46.53 | 33.43 | -59.34 | 17.73 |
| 5 | Helicase   | 5M1  | -8.2 | -51.45 | 3.58   | -0.47 | -37.04 | 25.60 | -47.67 | 10.53 |
|   | (Nsp13;    | 5M2  | -8.1 | -58.36 | -14.00 | -1.08 | -44.85 | 40.20 | -47.14 | 20.30 |
|   | ADP site)  | 5M3  | -7.4 | -41.60 | 0.07   | -1.05 | -25.70 | 25.30 | -46.38 | 15.40 |
|   |            | 5M4  | -7.4 | -43.57 | -4.76  | -0.94 | -20.96 | 26.38 | -41.90 | 8.24  |
|   |            | 5M5  | -7.2 | -42.84 | -1.62  | -0.62 | -30.25 | 33.94 | -43.98 | 15.09 |
|   |            | 5M6  | -7   | -43.91 | 0.88   | -0.79 | -28.14 | 23.51 | -42.16 | 4.90  |
|   |            | 5M7  | -6.9 | -30.56 | -8.96  | -1.16 | -21.45 | 34.31 | -32.69 | 25.67 |



|   |           |      |       |        |        |       |        |       |        |       |
|---|-----------|------|-------|--------|--------|-------|--------|-------|--------|-------|
|   |           | 5M8  | -6.9  | -32.24 | 0.44   | -1.28 | -27.50 | 29.49 | -48.16 | 22.49 |
|   |           | 5M9  | -6.9  | -34.07 | -1.23  | -1.33 | -13.37 | 25.09 | -40.68 | 9.57  |
|   |           | 5M10 | -6.9  | -52.34 | -9.45  | -1.38 | -33.29 | 29.46 | -41.89 | 6.86  |
| 6 | Helicase  | 6M1  | -10.2 | -71.63 | -10.34 | -0.27 | -83.87 | 49.51 | -52.32 | 34.01 |
|   | (Nsp13;   | 6M2  | -10.2 | -59.26 | 0.08   | -0.80 | -58.73 | 41.96 | -47.35 | 48.88 |
|   | NCB site) | 6M3  | -9.5  | -48.00 | -8.02  | -1.92 | -63.46 | 48.25 | -41.88 | 37.87 |
|   |           | 6M4  | -9.4  | -64.90 | -2.35  | -0.80 | -67.62 | 39.23 | -54.21 | 33.49 |
|   |           | 6M5  | -9.1  | -23.86 | -10.36 | -2.56 | -76.80 | 52.78 | -18.76 | 61.21 |
|   |           | 6M6  | -9    | -44.09 | 2.39   | -0.02 | -48.93 | 38.78 | -48.64 | 29.46 |
|   |           | 6M7  | -9    | -41.99 | -9.17  | -0.43 | -80.43 | 45.95 | -32.95 | 46.37 |
|   |           | 6M8  | -8.8  | -66.82 | -9.00  | -0.62 | -48.24 | 38.02 | -53.13 | 12.52 |
|   |           | 6M9  | -8.7  | -59.52 | 7.21   | -0.64 | -49.76 | 28.87 | -56.91 | 18.11 |
|   |           | 6M10 | -8.6  | -56.95 | 4.99   | -0.22 | -78.26 | 39.82 | -54.22 | 47.58 |
| 7 | Nsp14     | 7M1  | -8.7  | -58.71 | -4.40  | -0.37 | -42.85 | 36.28 | -53.26 | 21.70 |
|   | (ExoN)    | 7M2  | -8.5  | -49.54 | -0.71  | -0.70 | -40.54 | 34.61 | -45.91 | 24.56 |
|   |           | 7M3  | -8.4  | -53.50 | 2.90   | -0.30 | -44.91 | 34.07 | -53.04 | 20.80 |
|   |           | 7M4  | -8.1  | -53.02 | -0.77  | -0.71 | -42.29 | 38.50 | -50.67 | 14.45 |
|   |           | 7M5  | -8.1  | -41.37 | -19.01 | -0.77 | -35.30 | 46.23 | -47.43 | 30.89 |
|   |           | 7M6  | -8    | -34.12 | 2.70   | -0.22 | -36.32 | 19.28 | -33.99 | 27.81 |
|   |           | 7M7  | -7.9  | -63.96 | -5.31  | -0.14 | -38.29 | 24.52 | -44.44 | 8.19  |
|   |           | 7M8  | -7.9  | -42.33 | -16.42 | -0.46 | -31.59 | 53.72 | -48.73 | 20.86 |
|   |           | 7M9  | -7.6  | -34.19 | -0.92  | -0.35 | -33.47 | 37.79 | -42.88 | 17.71 |
|   |           | 7M10 | -7.5  | -41.04 | -10.47 | -0.21 | -32.30 | 33.63 | -39.72 | 30.75 |
| 8 | Nsp14     | 8M1  | -9.8  | -78.91 | -10.49 | -0.27 | -54.97 | 36.66 | -61.37 | 22.25 |
|   | (N7-      | 8M2  | -9.1  | -50.94 | -6.57  | -0.81 | -47.29 | 41.10 | -51.95 | 19.83 |
|   | MTase)    | 8M3  | -9    | -69.23 | -2.52  | -1.10 | -47.82 | 27.97 | -56.40 | 16.16 |

|    |         |      |      |        |        |       |        |       |        |       |
|----|---------|------|------|--------|--------|-------|--------|-------|--------|-------|
|    |         | 8M4  | -8.9 | -71.39 | 2.70   | -1.12 | -47.37 | 28.82 | -54.57 | 8.47  |
|    |         | 8M5  | -8.4 | -45.59 | 1.20   | -1.02 | -26.99 | 34.29 | -49.87 | 27.33 |
|    |         | 8M6  | -8.1 | -57.03 | 0.30   | -1.24 | -38.65 | 32.34 | -51.46 | 31.54 |
|    |         | 8M7  | -7.8 | -59.56 | -9.60  | -0.86 | -36.52 | 42.51 | -52.96 | 16.25 |
|    |         | 8M8  | -7.8 | -19.38 | 0.32   | -1.20 | -31.75 | 37.59 | -35.42 | 28.81 |
|    |         | 8M9  | -7.6 | -20.57 | 7.59   | -1.44 | -17.55 | 31.10 | -41.74 | 29.72 |
|    |         | 8M10 | -7.4 | -51.03 | -7.08  | -1.19 | -38.31 | 35.98 | -51.59 | 30.67 |
| 9  | Spike   | 9M1  | -7.6 | -63.61 | -14.25 | -1.04 | -42.92 | 27.98 | -45.85 | 17.45 |
|    | RBD     | 9M2  | -7.1 | -40.83 | -10.93 | -1.22 | -23.62 | 22.72 | -34.57 | 11.25 |
|    |         | 9M3  | -6.9 | -50.27 | -5.46  | -0.29 | -37.67 | 17.08 | -38.93 | 18.86 |
|    |         | 9M4  | -6.8 | -44.81 | -11.13 | -0.39 | -26.99 | 25.76 | -35.30 | 30.79 |
|    |         | 9M5  | -6.7 | -69.13 | -11.49 | -1.71 | -39.45 | 24.60 | -45.26 | 20.97 |
|    |         | 9M6  | -6.4 | -41.75 | -0.30  | -0.16 | -30.06 | 19.32 | -37.66 | 9.96  |
|    |         | 9M7  | -6.3 | -53.83 | 0.30   | -0.05 | -37.48 | 14.48 | -34.24 | 5.48  |
|    |         | 9M8  | -6.2 | -52.18 | -8.56  | -0.66 | -29.49 | 19.94 | -31.65 | 12.56 |
|    |         | 9M9  | -6.1 | -50.37 | -3.73  | -0.01 | -32.47 | 16.78 | -32.88 | 4.76  |
|    |         | 9M10 | -5.8 | -48.26 | -3.58  | -0.25 | -32.57 | 20.11 | -36.46 | 18.89 |
| 10 | Spike   | 10M1 | -5.5 | -55.86 | -4.40  | -0.05 | -39.85 | 17.87 | -33.46 | 7.64  |
|    | monomer | 10M2 | -5.5 | -19.44 | -16.77 | -1.24 | -9.04  | 23.55 | -13.51 | 4.09  |
|    | (close) | 10M3 | -5.5 | -43.82 | -12.18 | -1.06 | -27.70 | 19.88 | -24.35 | 15.68 |
|    |         | 10M4 | -5.4 | -55.19 | -13.02 | -0.25 | -32.92 | 17.14 | -30.20 | 6.00  |
|    |         | 10M5 | -5.4 | -36.13 | -0.30  | -0.02 | -24.63 | 12.22 | -26.47 | 0.39  |
|    |         | 10M6 | -5.3 | -54.61 | -18.71 | -0.72 | -37.01 | 32.33 | -38.71 | 28.25 |
|    |         | 10M7 | -5.3 | -4.85  | 5.90   | -0.58 | -10.11 | 3.98  | -10.48 | 13.18 |
|    |         | 10M8 | -5.3 | -29.01 | 1.75   | -0.18 | -22.04 | 5.34  | -16.68 | 4.99  |
|    |         | 10M9 | -5.2 | -14.00 | 0.41   | -0.47 | -11.45 | 8.70  | -12.75 | 1.00  |

|    |           |       |      |        |        |       |        |       |        |       |
|----|-----------|-------|------|--------|--------|-------|--------|-------|--------|-------|
|    |           | 10M10 | -5.2 | -55.30 | -16.69 | -1.92 | -32.54 | 24.58 | -33.97 | 14.56 |
| 11 | Spike     | 11M1  | -8.2 | -71.20 | -1.84  | -0.86 | -54.53 | 27.07 | -46.38 | 10.21 |
|    | trimer    | 11M2  | -8   | -52.79 | -3.06  | -1.08 | -37.63 | 29.81 | -44.18 | 30.66 |
|    | (open)    | 11M3  | -7.6 | -61.08 | -2.92  | -0.19 | -36.32 | 22.75 | -42.30 | 10.27 |
|    |           | 11M4  | -7.5 | -61.96 | -4.15  | -0.03 | -54.68 | 20.74 | -37.72 | 20.06 |
|    |           | 11M5  | -7.5 | -52.38 | -3.91  | -0.15 | -39.60 | 24.30 | -32.71 | 25.00 |
|    |           | 11M6  | -7.3 | -51.41 | -1.00  | -1.15 | -61.34 | 29.43 | -39.51 | 44.07 |
|    |           | 11M7  | -7.3 | -55.82 | 1.18   | -0.01 | -45.29 | 17.36 | -34.74 | 14.74 |
|    |           | 11M8  | -7.2 | -61.95 | 3.59   | -0.61 | -39.23 | 15.05 | -51.12 | 27.10 |
|    |           | 11M9  | -7   | -72.40 | -0.33  | -0.81 | -38.38 | 14.86 | -49.10 | 8.60  |
|    |           | 11M10 | -7   | -53.00 | -4.59  | -0.77 | -35.87 | 23.92 | -44.85 | 14.87 |
| 12 | S2 (post  | 12M1  | -6   | -40.41 | 0.32   | -0.78 | -22.69 | 18.97 | -34.76 | 23.43 |
|    | fusion    | 12M2  | -5.9 | -47.95 | 1.47   | -1.15 | -27.93 | 17.40 | -39.96 | 8.94  |
|    | state)    | 12M3  | -5.7 | -54.73 | -2.52  | 0.00  | -40.67 | 15.14 | -33.61 | 10.54 |
|    |           | 12M4  | -5.6 | -33.76 | -0.20  | -0.22 | -29.17 | 27.02 | -42.52 | 15.04 |
|    |           | 12M5  | -5.5 | -31.64 | -1.66  | -0.01 | -28.85 | 24.59 | -36.78 | 17.89 |
|    |           | 12M6  | -5.5 | -21.64 | -4.21  | -0.86 | -13.30 | 30.25 | -36.32 | 29.04 |
|    |           | 12M7  | -5.4 | -55.04 | -1.88  | -0.01 | -37.05 | 12.40 | -32.39 | 21.49 |
|    |           | 12M8  | -5.4 | -31.83 | -2.66  | -1.65 | -21.34 | 24.54 | -34.67 | 11.23 |
|    |           | 12M9  | -5.4 | -47.32 | -1.19  | -0.02 | -34.09 | 22.83 | -40.47 | 10.86 |
|    |           | 12M10 | -5.3 | -59.55 | -8.91  | -0.22 | -30.96 | 27.39 | -45.20 | 10.16 |
| 13 | N protein | 13M1  | -6.6 | -43.08 | 1.94   | -0.79 | -38.34 | 26.86 | -46.04 | 17.87 |
|    | (C        | 13M2  | -6.5 | -54.67 | -7.77  | -0.50 | -43.56 | 24.11 | -39.13 | 31.60 |
|    | domain)   | 13M3  | -6.2 | -57.02 | -8.28  | -0.91 | -37.67 | 26.51 | -43.74 | 17.17 |
|    |           | 13M4  | -6.2 | -59.89 | -8.26  | -0.71 | -49.02 | 25.64 | -43.42 | 21.36 |
|    |           | 13M5  | -6.1 | -55.44 | 3.85   | -0.40 | -43.61 | 28.24 | -50.93 | 12.95 |

|    |                   |       |      |        |        |       |        |       |        |       |
|----|-------------------|-------|------|--------|--------|-------|--------|-------|--------|-------|
|    |                   | 13M6  | -6.1 | -74.58 | -15.43 | -1.30 | -46.28 | 31.11 | -44.83 | 12.51 |
|    |                   | 13M7  | -6   | -75.33 | -9.61  | -0.78 | -50.50 | 27.96 | -50.23 | 10.83 |
|    |                   | 13M8  | -6   | -52.03 | -8.25  | -1.26 | -39.87 | 28.52 | -39.89 | 12.71 |
|    |                   | 13M9  | -5.9 | -74.91 | -6.92  | -0.49 | -61.47 | 21.91 | -40.37 | 14.79 |
|    |                   | 13M10 | -5.8 | -72.42 | -9.56  | -0.69 | -54.56 | 26.33 | -42.68 | 18.36 |
| 14 | N protein         | 14M1  | -8.2 | -54.80 | -11.84 | -2.62 | -34.99 | 35.80 | -50.86 | 33.29 |
|    | (N                | 14M2  | -8   | -45.67 | -4.55  | -1.84 | -45.75 | 21.72 | -40.33 | 29.16 |
|    | domain)           | 14M3  | -8   | -62.48 | -6.83  | -1.03 | -41.21 | 24.23 | -39.69 | 14.56 |
|    |                   | 14M4  | -7.7 | -52.73 | -7.13  | -1.55 | -37.75 | 27.31 | -39.46 | 17.43 |
|    |                   | 14M5  | -7.6 | -57.18 | -0.94  | -1.74 | -41.86 | 27.04 | -47.73 | 5.46  |
|    |                   | 14M6  | -7.6 | -63.69 | -17.38 | -1.96 | -37.56 | 34.32 | -45.23 | 24.31 |
|    |                   | 14M7  | -7.5 | -53.06 | -2.02  | -1.33 | -32.08 | 23.39 | -39.56 | 25.34 |
|    |                   | 14M8  | -7.4 | -63.93 | -25.04 | -1.18 | -35.35 | 29.84 | -38.64 | 16.73 |
|    |                   | 14M9  | -7.4 | -67.44 | -13.89 | -0.53 | -42.74 | 32.84 | -50.30 | 9.53  |
|    |                   | 14M10 | -7.3 | -69.03 | -3.60  | -0.11 | -54.29 | 31.69 | -58.15 | 5.48  |
| 15 | Nsp9              | 15M1  | -5.9 | -84.70 | -9.29  | -0.48 | -59.65 | 14.77 | -43.69 | 16.60 |
|    |                   | 15M2  | -5.8 | -63.43 | -4.59  | -0.50 | -38.36 | 10.47 | -34.39 | 8.58  |
|    |                   | 15M3  | -5.6 | -51.43 | -17.64 | -0.77 | -32.96 | 18.49 | -26.79 | 21.47 |
|    |                   | 15M4  | -5.6 | -70.78 | -16.48 | -0.95 | -38.69 | 13.32 | -32.88 | 8.31  |
|    |                   | 15M5  | -5.6 | -73.66 | -4.28  | -0.25 | -44.05 | 13.21 | -39.99 | 9.18  |
|    |                   | 15M6  | -5.5 | -52.73 | 0.55   | -0.11 | -29.08 | 9.00  | -39.43 | 12.51 |
|    |                   | 15M7  | -5.4 | -76.54 | -23.21 | -0.94 | -36.04 | 17.81 | -32.67 | -0.42 |
|    |                   | 15M8  | -5.4 | -42.16 | 4.33   | -0.39 | -23.34 | 11.39 | -31.92 | 21.92 |
|    |                   | 15M9  | -5.3 | -84.85 | -12.53 | -0.79 | -50.48 | 14.06 | -42.88 | 20.54 |
|    |                   | 15M10 | -5.3 | -47.13 | 2.59   | -0.14 | -24.60 | 10.59 | -38.12 | 17.36 |
| 16 | Importin $\alpha$ | 16M1  | -7.4 | -43.60 | -1.41  | -0.33 | -42.20 | 30.91 | -45.76 | 23.71 |

---

|       |      |        |        |       |        |       |        |       |
|-------|------|--------|--------|-------|--------|-------|--------|-------|
| 16M2  | -7.4 | -54.34 | -1.86  | -1.53 | -43.47 | 27.75 | -44.34 | 22.27 |
| 16M3  | -7.2 | -44.89 | 6.21   | -0.31 | -36.86 | 33.73 | -53.25 | 14.02 |
| 16M4  | -7.2 | -59.70 | -9.28  | -0.06 | -38.76 | 31.45 | -47.79 | 13.37 |
| 16M5  | -7   | -51.09 | -1.57  | -0.14 | -39.83 | 27.79 | -50.23 | 20.42 |
| 16M6  | -7   | -63.16 | 1.00   | -1.04 | -34.40 | 28.67 | -52.88 | 22.07 |
| 16M7  | -6.9 | -49.50 | -9.38  | -0.59 | -33.08 | 27.13 | -38.96 | 22.44 |
| 16M8  | -6.9 | -43.67 | 1.96   | -1.03 | -39.78 | 42.26 | -51.11 | 10.84 |
| 16M9  | -6.9 | -66.04 | -24.26 | -1.45 | -35.74 | 37.83 | -45.41 | 6.34  |
| 16M10 | -6.9 | -65.63 | -22.43 | -1.46 | -34.64 | 27.99 | -39.93 | 10.02 |

---

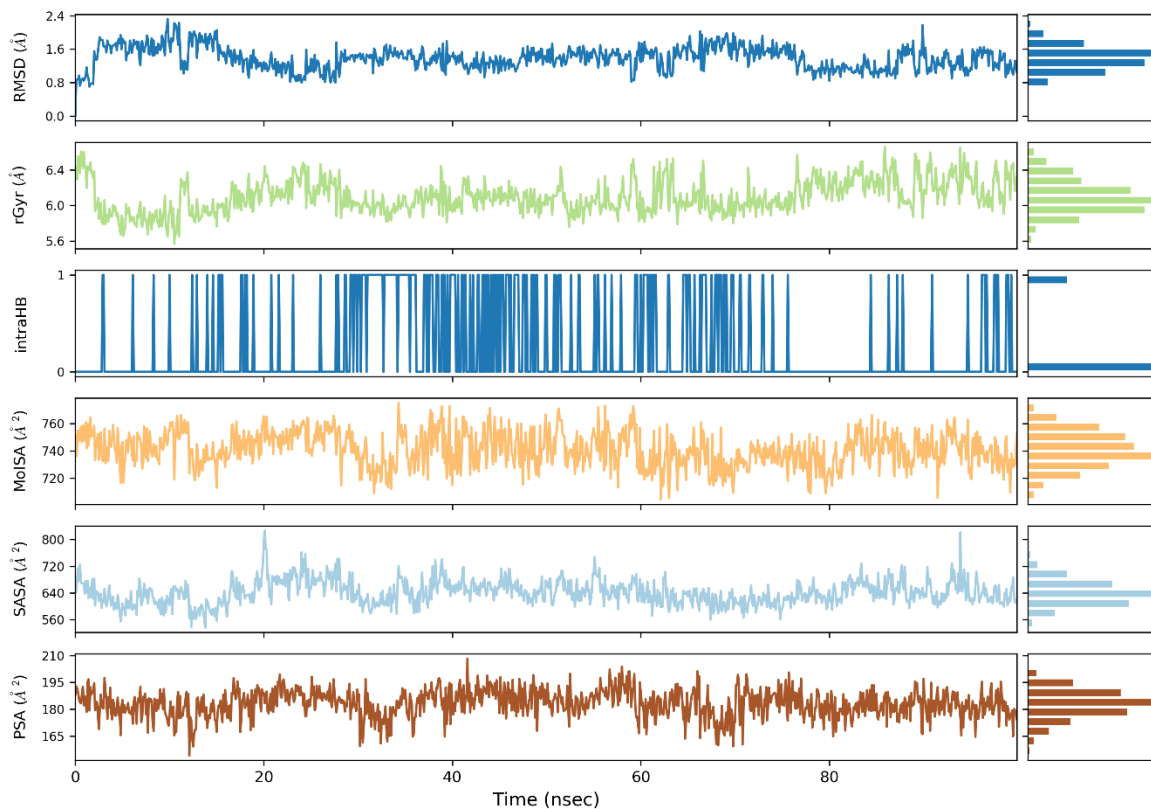

**Fig. S1.** Root mean square deviation (RMSD) of ivermectin with respect to the reference conformation in Nsp9 binding pocket; rGyr: Radius of Gyration which measures the 'extendedness' of a ligand; intraHB: Intramolecular Hydrogen Bonds; MolSA: Molecular Surface Area; SASA: Solvent Accessible Surface Area; PSA: Polar Surface Area

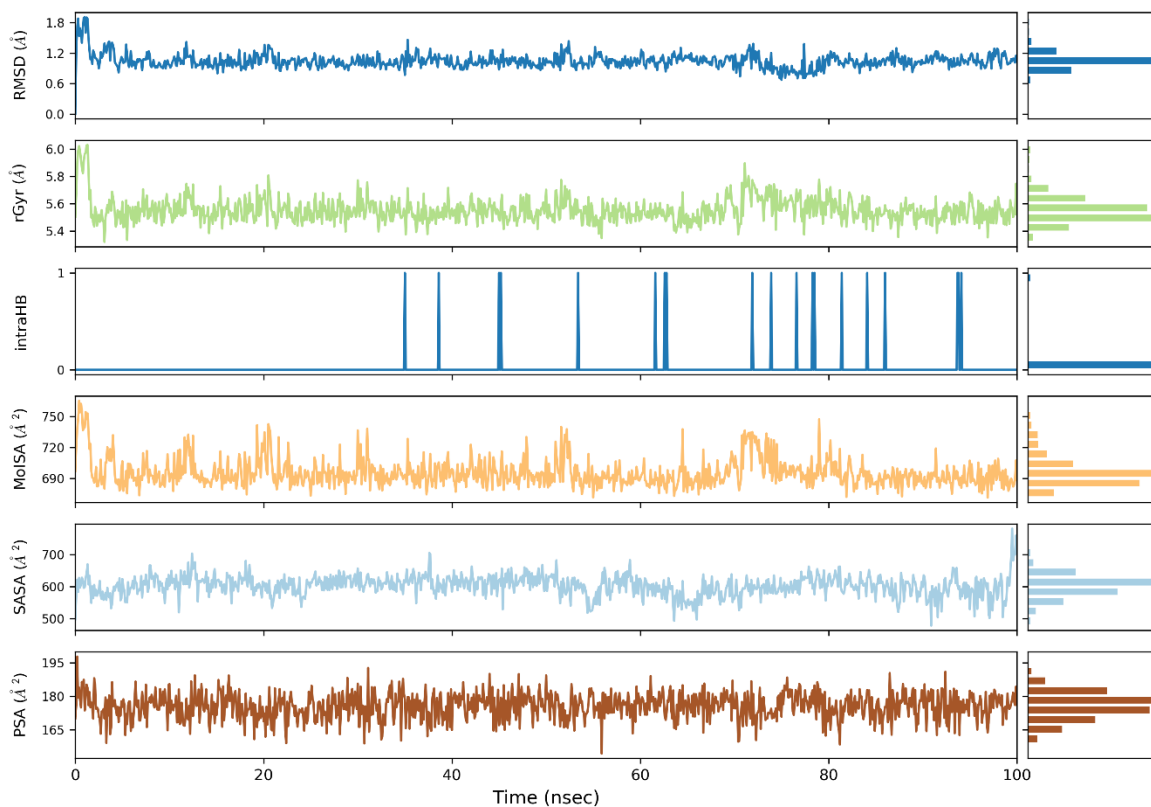

**Fig. S2.** Root mean square deviation (RMSD) of ivermectin with respect to the reference conformation in importin  $\alpha$  binding pocket; rGyr: Radius of Gyration which measures the 'extendedness' of a ligand; intraHB: Intramolecular Hydrogen Bonds; MolSA: Molecular Surface Area; SASA: Solvent Accessible Surface Area; PSA: Polar Surface Area.

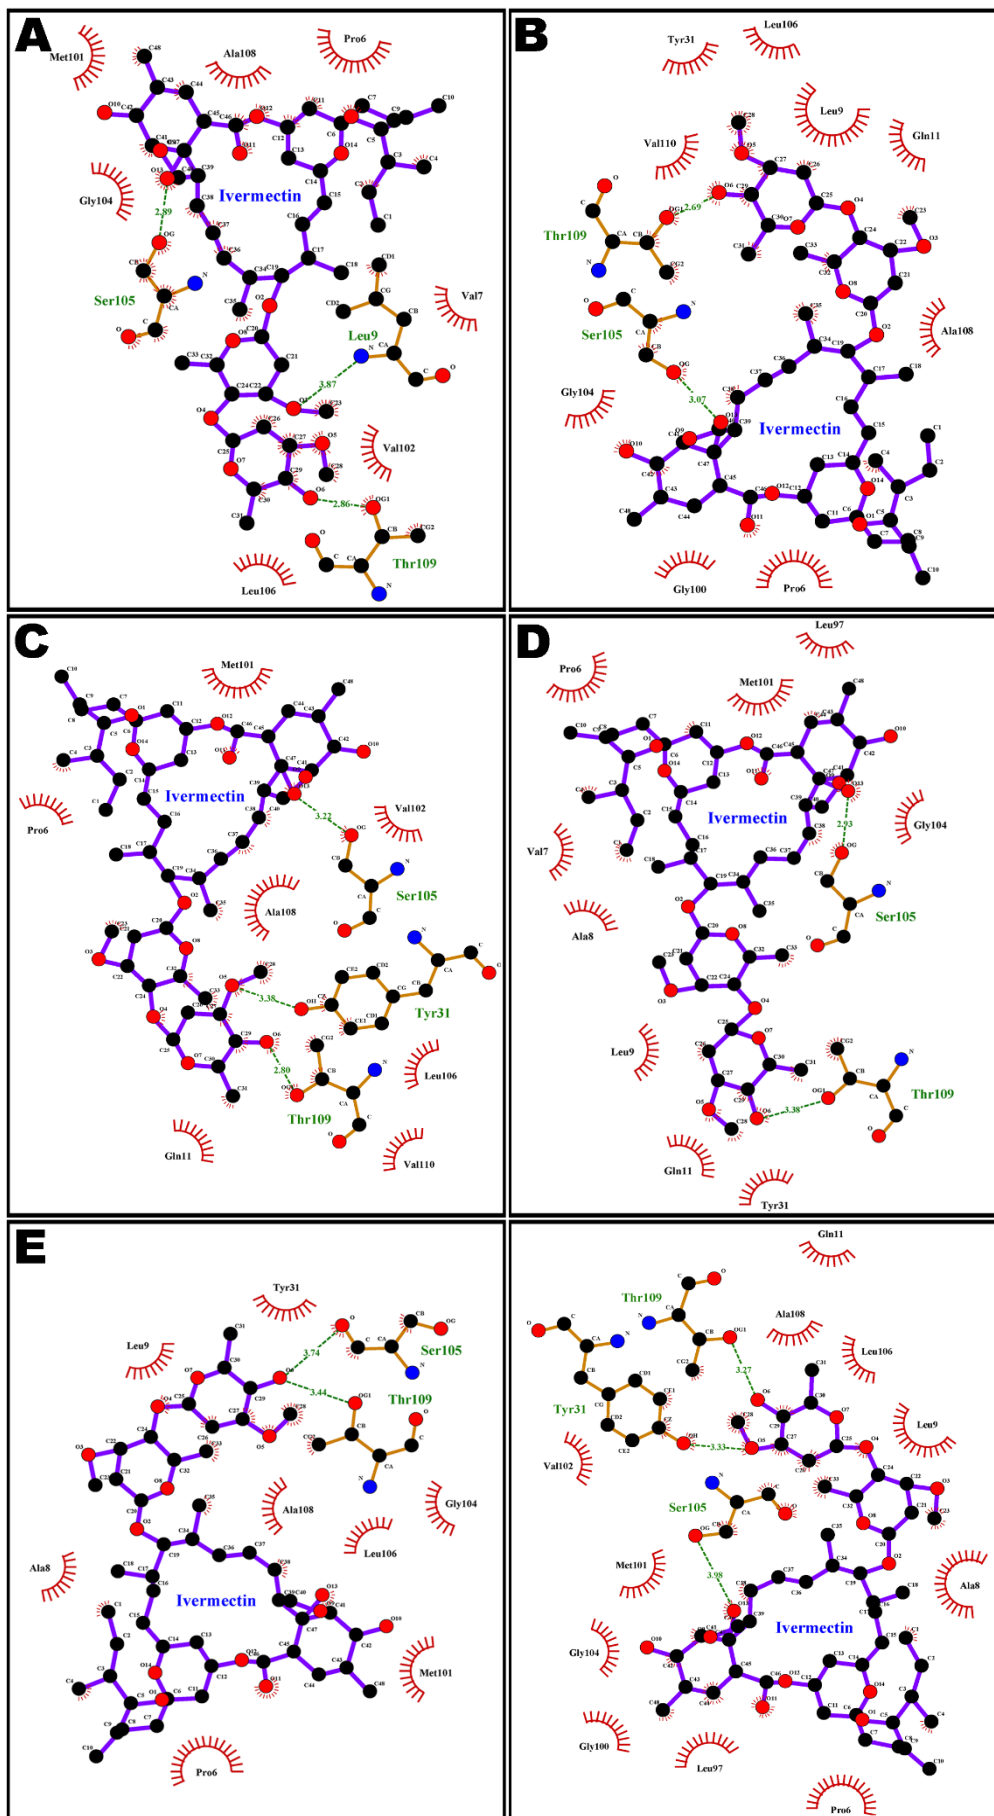

**Fig. S3.** Analysis of hydrogen bond lengths between ivermectin and residues of Nsp9 target during the MD simulation trajectory. Snapshots were taken at 50ns (A), 60ns (B), 70ns (C), 80ns (D), 90ns (E) and 100ns (F).



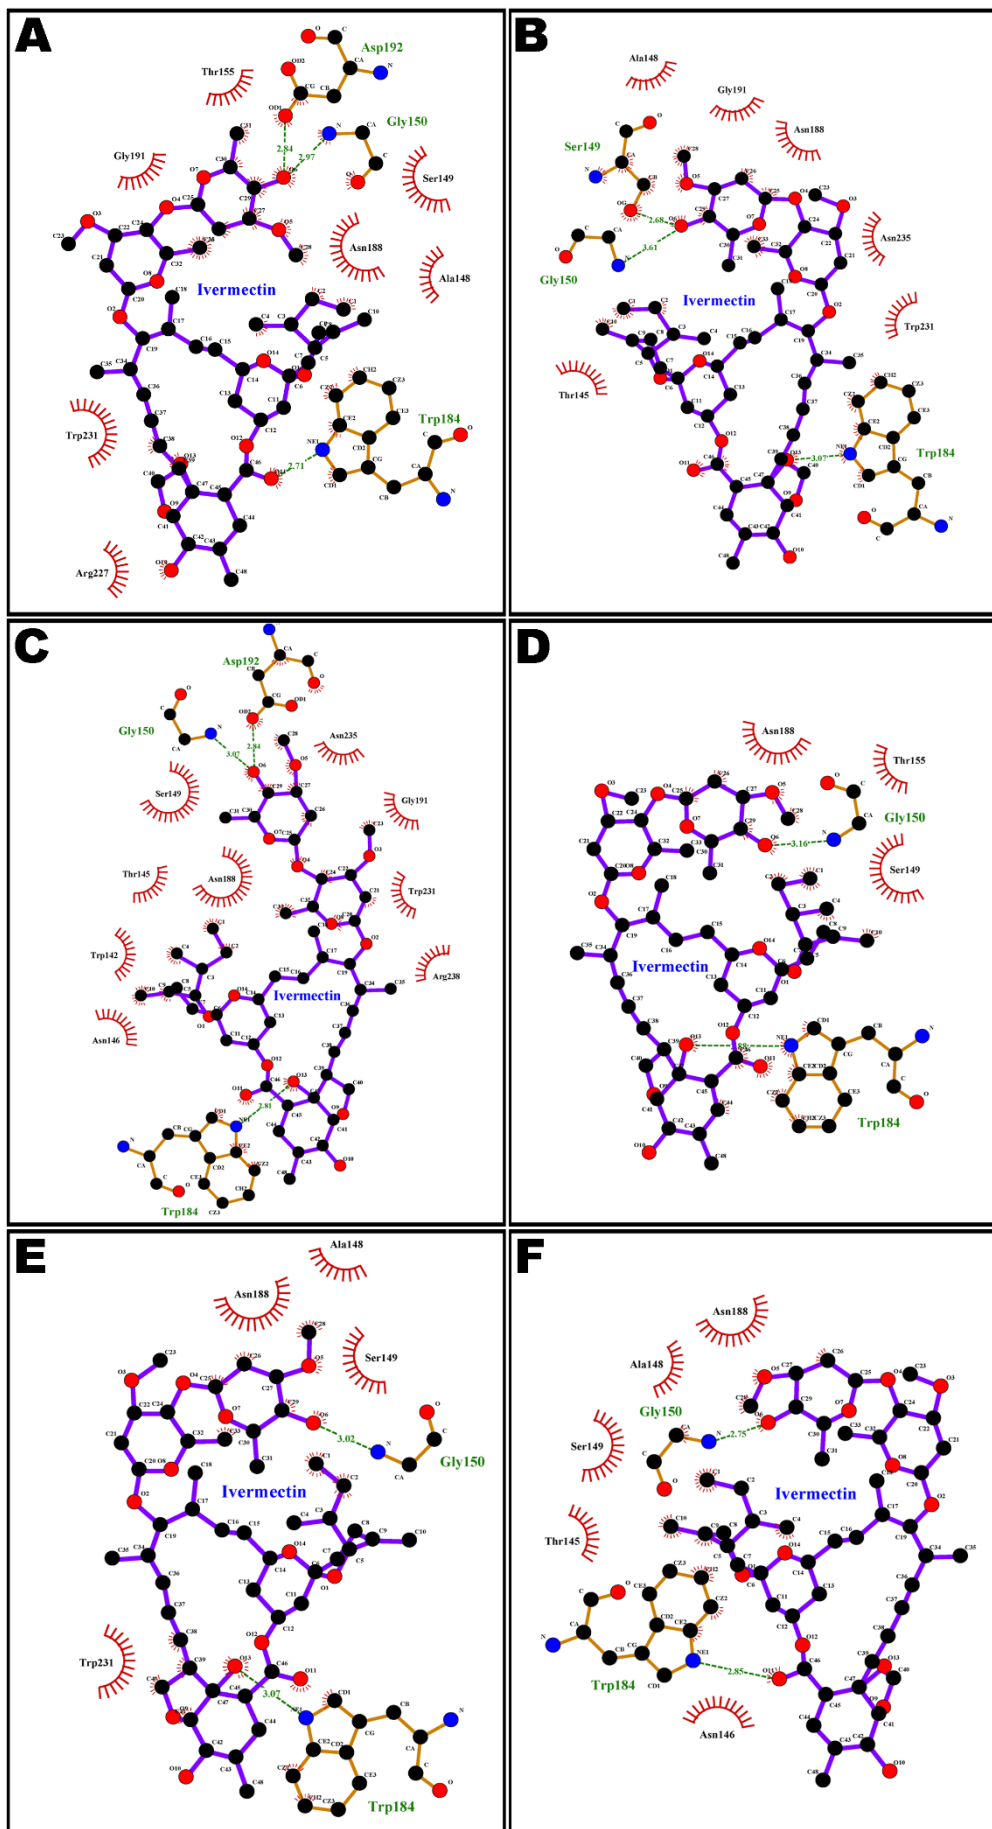

**Fig. S4.** Analysis of hydrogen bond lengths between ivermectin and residues of importin  $\alpha$  target during the MD simulation period. Snapshots were taken at 50ns (A), 60ns (B), 70ns (C), 80ns (D), 90ns (E) and 100ns (F).

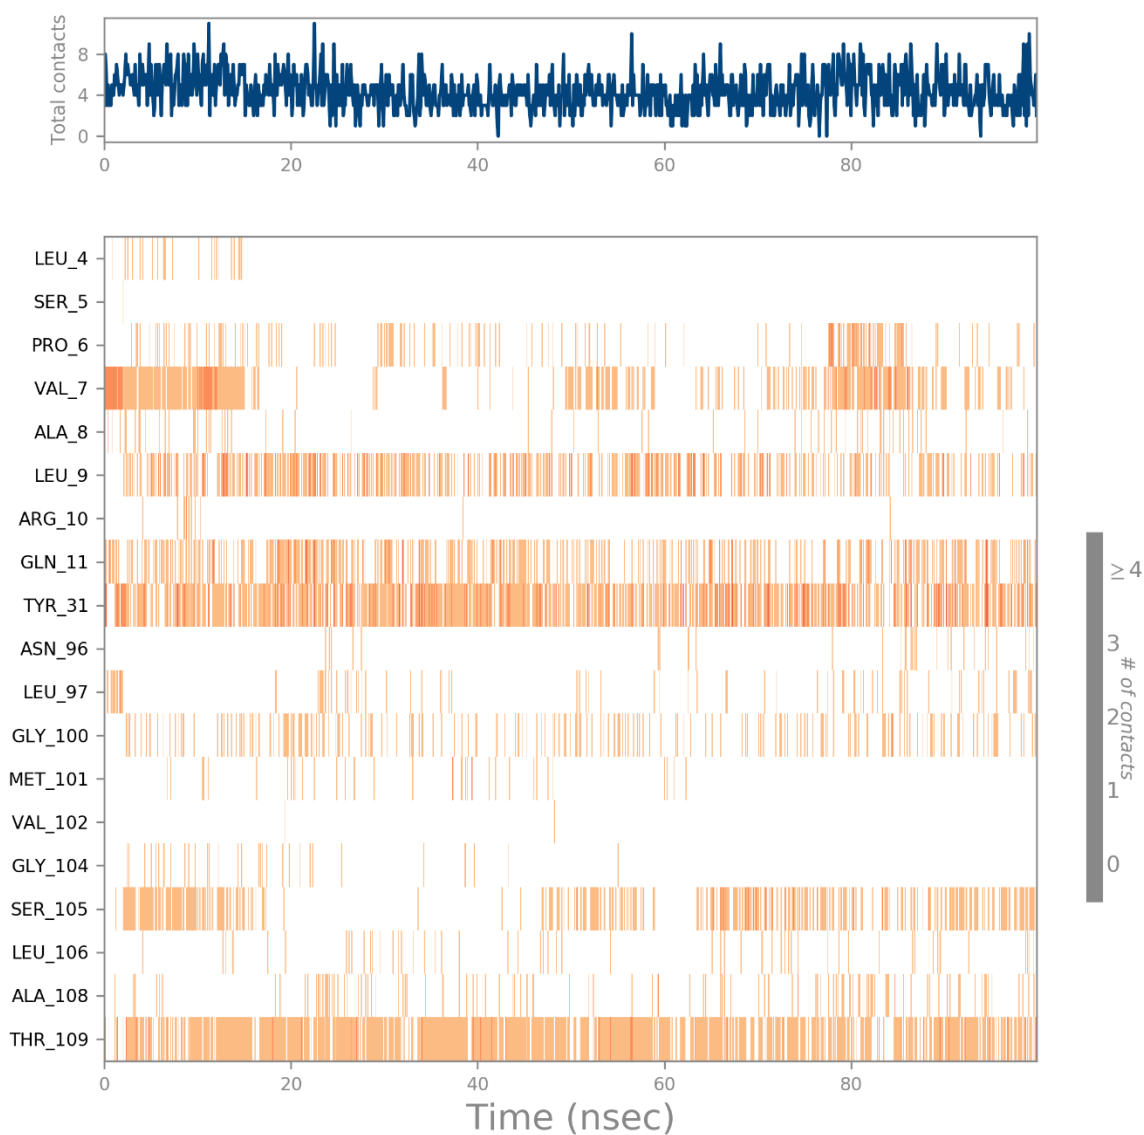

**Fig. S5.** A timeline representation of the interactions and contacts (H-bonds, Hydrophobic, Ionic, Water bridges) between residues of Nsp9 and ivermectin in each trajectory frame. Some residues make more than one specific contact with the ligand, which is represented by a darker shade of orange, according to the scale to the right of the plot.

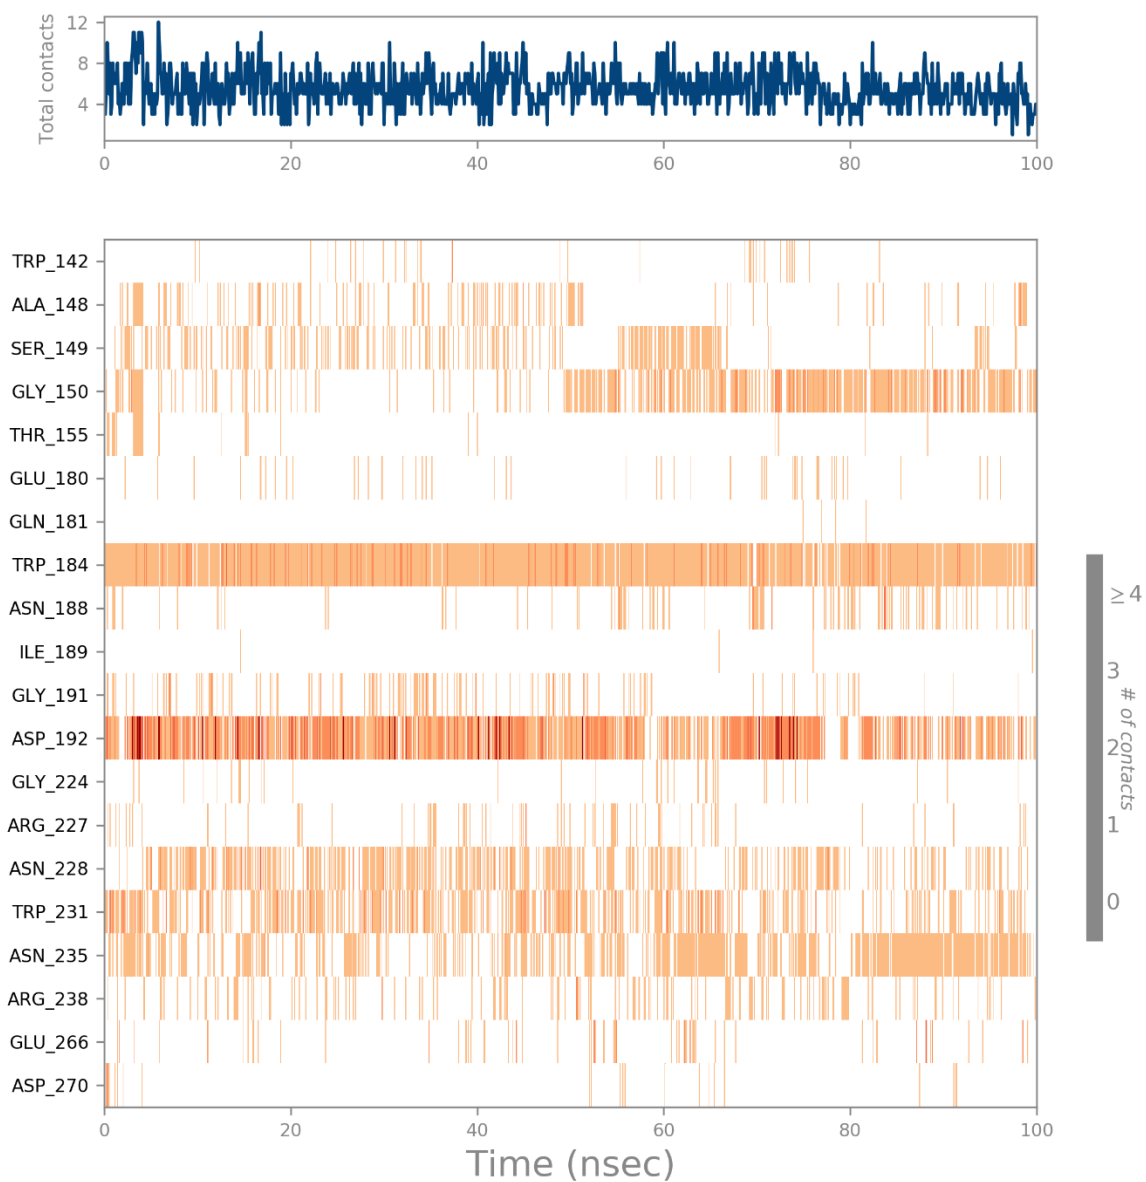

**Fig. S6.** A timeline representation of the interactions and contacts (H-bonds, Hydrophobic, Ionic, Water bridges) between residues of IMP $\alpha$  and ivermectin in each trajectory frame. Some residues make more than one specific contact with the ligand, which is represented by a darker shade of orange, according to the scale to the right of the plot.
